# Supplementary material for: High pressure induced spin changes and magneto-structural correlations in hexametallic SMMs
Source: Royal Society of Chemistry journal article supplement (doi:10.1039/b902485a), 2009-01-01

Figure SI1. Plot of  $\chi_m T$  vs  $T$  for complex **1** in the 100 - 5 K temperature range and the indicated pressures. The solid lines are simulations of the experimental data. See main text for details.

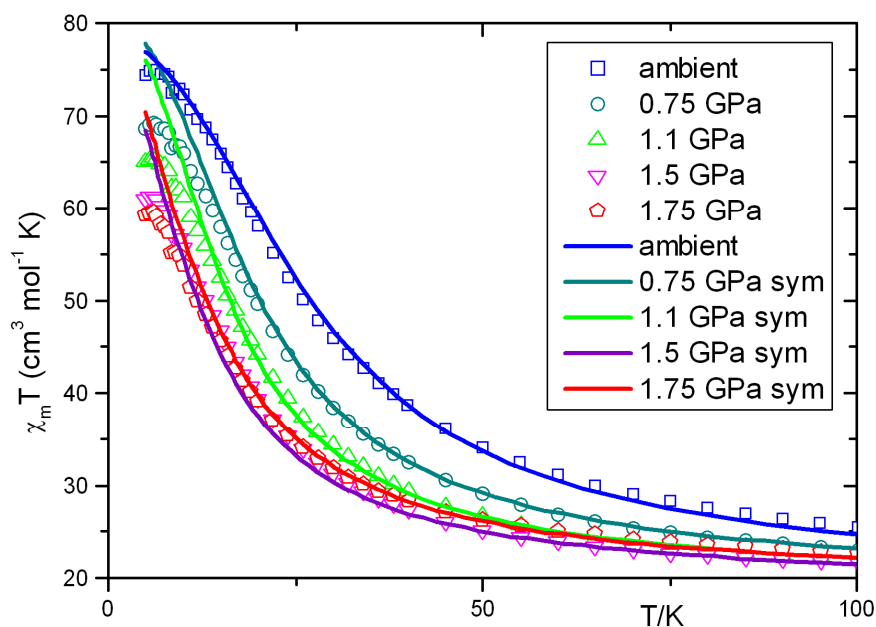

Figure SI2. Plot of  $\chi_m T$  vs  $T$  for complex **2** in the 100 - 5 K temperature range and the indicated pressures. The solid lines are simulations of the experimental data. See main text for details.

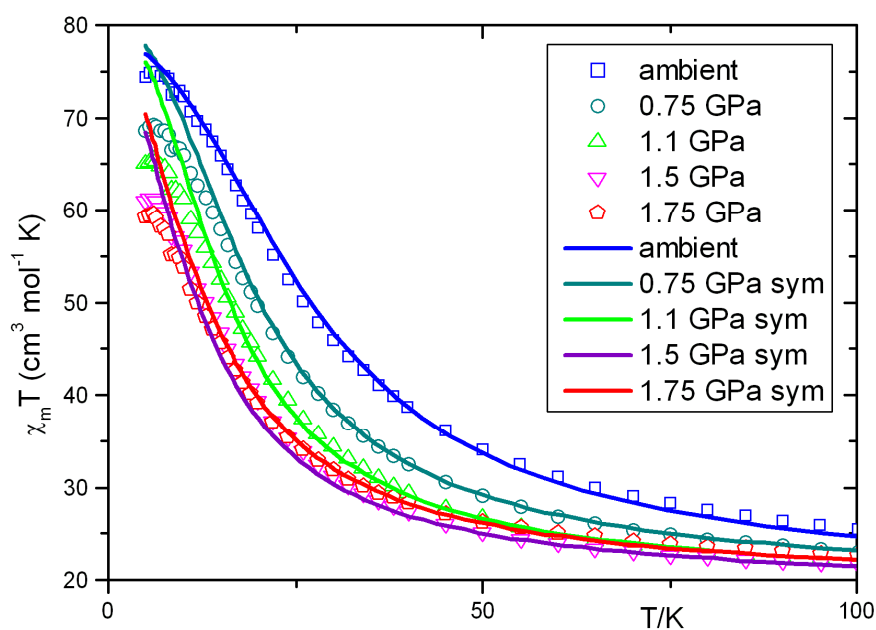

Supplement: b902485a.pdf [file b902485a.pdf]
